# Supplementary material for: A Retrospective Study of Non-Communicable Diseases amongst Blue-Collar Migrant Workers in Qatar
Source: MDPI journal article supplement (doi:10.3390/ijerph19042266), 2022-02-17
Supplement: s1 [file s1]

Supplementary Table S1. Proportion of visits by ICD diagnosis according to duration of residence in Qatar among blue collar workers during study the period Jan 2017 to May 2018.

|                                                                                                                    | <6 months                | 6-≤12 months         | 1 - ≤2 years         | 2 - ≤5 years                  | 5 - ≤6 years                   | > 6 years                         |
|--------------------------------------------------------------------------------------------------------------------|--------------------------|----------------------|----------------------|-------------------------------|--------------------------------|-----------------------------------|
|                                                                                                                    | n(%)                     | n(%)                 | n(%)                 | n(%)                          | n(%)                           | n(%)                              |
| <b>ICD Sub chapters</b>                                                                                            | <b>A</b>                 | <b>B</b>             | <b>C</b>             | <b>D</b>                      | <b>E</b>                       | <b>F</b>                          |
| <b>E00-E89: Endocrine, nutritional and metabolic diseases</b>                                                      | <b>148(22.3)</b>         | <b>222(9.6)</b>      | <b>739(7.8)</b>      | <b>2687(12.1)<sup>c</sup></b> | <b>623(15.9)<sup>bcd</sup></b> | <b>6293(31.9)<sup>abcde</sup></b> |
| E08-E13: Diabetes mellitus                                                                                         | 110(16.6) <sup>bcd</sup> | 160(6.9)             | 512(5.4)             | 1792(8.0) <sup>c</sup>        | 418(10.7) <sup>bcd</sup>       | 4361(22.1) <sup>abcde</sup>       |
| E65-E68: Overweight, obesity and other hyperalimentation                                                           | 19(2.9) <sup>c</sup>     | 34(1.5)              | 112(1.2)             | 410(1.8) <sup>c</sup>         | 96(2.5) <sup>e</sup>           | 1101(5.6) <sup>abcde</sup>        |
| E70-E88: Metabolic disorders                                                                                       | 109(16.4) <sup>bcd</sup> | 152(6.6)             | 515(5.4)             | 1983(8.9) <sup>bc</sup>       | 453(11.6) <sup>bcd</sup>       | 4904(24.9) <sup>abcde</sup>       |
| E00-07;15-16;20-35;50-64;89 Others                                                                                 | 8(1.2) <sup>c</sup>      | 10(0.4)              | 33(0.3)              | 97(0.4)                       | 21(0.5)                        | 153(0.8) <sup>cd</sup>            |
| <b>H00-H59: Diseases of the eye and adnexa</b>                                                                     | <b>35(5.3)</b>           | <b>164(7.1)</b>      | <b>515(5.4)</b>      | <b>1325(5.9)</b>              | <b>235(6.0)</b>                | <b>1278(6.5)</b>                  |
| H00-H05: Disorders of eyelid, lacrimal system and orbit                                                            | 20(3.0)                  | 83(3.6)              | 288(3.0)             | 731(3.3)                      | 134(3.4)                       | 593(3.0)                          |
| H10-H11: Disorders of conjunctiva                                                                                  | 1(0.2)                   | 19(0.8)              | 59(0.6)              | 181(0.8)                      | 36(0.9)                        | 155(0.8)                          |
| H15-H22: Disorders of sclera, cornea, iris and ciliary body                                                        | 3(0.5)                   | 14(0.6)              | 48(0.5)              | 90(0.4)                       | 24(0.6)                        | 107(0.5)                          |
| H49-H52: Disorders of ocular muscles, binocular movement, accommodation and refraction                             | 8(1.2)                   | 26(1.1)              | 65(0.7)              | 203(0.9)                      | 32(0.8)                        | 333(1.7) <sup>cde</sup>           |
| H59-H59: Intraoperative and postprocedural complications and disorders of eye and adnexa, not elsewhere classified | 4(0.6)                   | 28(1.2)              | 78(0.8)              | 195(0.9)                      | 27(0.7)                        | 170(0.9)                          |
| <b>H60-H95: Diseases of the ear and mastoid process</b>                                                            | <b>16(2.4)</b>           | <b>84(3.6)</b>       | <b>278(2.9)</b>      | <b>620(2.8)</b>               | <b>112(2.9)</b>                | <b>465(2.4)</b>                   |
| H60-H62: Diseases of external ear                                                                                  | 3(0.5)                   | 27(1.2) <sup>f</sup> | 81(0.9)              | 163(0.7)                      | 30(0.8)                        | 115(0.6)                          |
| H65-H75: Diseases of middle ear and mastoid                                                                        | 8(1.2)                   | 38(1.6) <sup>f</sup> | 105(1.1)             | 243(1.1) <sup>f</sup>         | 45(1.2)                        | 156(0.8)                          |
| H80-H83: Diseases of inner ear                                                                                     | 3(0.5)                   | 15(0.6)              | 56(0.6)              | 152(0.7)                      | 32(0.8)                        | 160(0.8)                          |
| H90-H94: Other disorders of ear                                                                                    | 3(0.5)                   | 14(0.6)              | 61(0.6) <sup>f</sup> | 97(0.4)                       | 13(0.3)                        | 63(0.3)                           |
| H25-28;30-36;40-44;46-47;56-57 Others                                                                              | 1(0.2)                   | 11(0.5)              | 26(0.3)              | 88(0.4)                       | 9(0.2)                         | 107(0.5) <sup>c</sup>             |
| <b>I00-I99: Diseases of the circulatory system</b>                                                                 | <b>81(12.2)</b>          | <b>146(6.3)</b>      | <b>528(5.6)</b>      | <b>1793(8.0)</b>              | <b>453(11.6)</b>               | <b>4643(23.6)</b>                 |
| I10-I16: Hypertensive diseases                                                                                     | 76(11.5) <sup>bcd</sup>  | 128(5.5)             | 455(4.8)             | 1615(7.2) <sup>bc</sup>       | 418(10.7) <sup>bcd</sup>       | 4431(22.5) <sup>abcde</sup>       |
| I20-I25: Ischemic heart diseases                                                                                   | 5(0.8)                   | 9(0.4)               | 29(0.3)              | 106(0.5)                      | 16(0.4)                        | 257(1.3) <sup>bcd</sup>           |
| I00-02;05-09;26-28;30-52;60-89;95-99 Others                                                                        | 3(0.5)                   | 16(0.7)              | 65(0.7)              | 150(0.7)                      | 32(0.8)                        | 184(0.9) <sup>d</sup>             |
| <b>J00-J99: Diseases of the respiratory system</b>                                                                 | <b>254(38.3)</b>         | <b>1082(46.9)</b>    | <b>4204(44.4)</b>    | <b>8607(38.6)</b>             | <b>1384(35.4)</b>              | <b>6339(32.2)</b>                 |

|                                                                              |                        |                               |                               |                          |                         |                         |
|------------------------------------------------------------------------------|------------------------|-------------------------------|-------------------------------|--------------------------|-------------------------|-------------------------|
| J00-J06: Acute upper respiratory infections                                  | 215(32.4) <sup>f</sup> | 937(40.6) <sup>ad</sup><br>ef | 3552(37.5) <sup>d</sup><br>ef | 7067(31.7) <sup>ef</sup> | 1098(28.1) <sup>f</sup> | 4815(24.4)              |
| J09-J18: Influenza and pneumonia                                             | 4(0.6)                 | 29(1.3) <sup>f</sup>          | 131(1.4) <sup>def</sup>       | 198(0.9)                 | 28(0.7)                 | 135(0.7)                |
| J20-J22: Other acute lower respiratory infections                            | 32(4.8)                | 148(6.4) <sup>f</sup>         | 521(5.5)                      | 1181(5.3)                | 209(5.3)                | 982(5.0)                |
| J30-J39: Other diseases of upper respiratory tract                           | 24(3.6)                | 74(3.2)                       | 323(3.4)                      | 828(3.7) <sup>f</sup>    | 110(2.8)                | 615(3.1)                |
| J40-J47: Chronic lower respiratory diseases                                  | 18(2.7)                | 38(1.6)                       | 180(1.9)                      | 473(2.1)                 | 103(2.6)                | 774(3.9) <sup>bcd</sup> |
| J60-70;80-86;90-94;96-99 Others                                              | 1(0.2)                 | 3(0.1)                        | 7(0.1)                        | 22(0.1)                  | 4(0.1)                  | 14(0.1)                 |
| <b>K00-K95: Diseases of the digestive system</b>                             | <b>170(25.6)</b>       | <b>586(25.4)</b>              | <b>2361(24.9)</b>             | <b>5382(24.2)</b>        | <b>941(24.1)</b>        | <b>4457(22.6)</b>       |
| K00-K14: Diseases of oral cavity and salivary glands                         | 68(10.3)               | 214(9.3)                      | 994(10.5)                     | 2307(10.4)               | 399(10.2)               | 1948(9.9)               |
| K20-K31: Diseases of esophagus, stomach and duodenum                         | 76(11.5)               | 284(12.3) <sup>def</sup>      | 975(10.3) <sup>f</sup>        | 2222(10.0) <sup>f</sup>  | 346(8.9)                | 1648(8.4)               |
| K55-K64: Other diseases of intestines                                        | 2(0.3)                 | 5(0.2)                        | 29(0.3) <sup>f</sup>          | 47(0.2)                  | 13(0.3)                 | 26(0.1)                 |
| K35-38;40-46;50-52;70-77;80-87;90-95 Others                                  | 38(5.7)                | 185(8.0) <sup>d</sup>         | 612(6.5)                      | 1395(6.3)                | 258(6.6)                | 1269(6.4)               |
| <b>L00-L99: Diseases of the skin and subcutaneous tissue</b>                 | <b>85(12.8)</b>        | <b>336(14.6)</b>              | <b>1315(13.9)</b>             | <b>3005(13.5)</b>        | <b>494(12.6)</b>        | <b>2356(12.0)</b>       |
| L00-L08: Infections of the skin and subcutaneous tissue                      | 24(3.6)                | 68(2.9)                       | 264(2.8)                      | 659(3.0) <sup>f</sup>    | 111(2.8)                | 471(2.4)                |
| L20-L30: Dermatitis and eczema                                               | 36(5.4)                | 172(7.5)                      | 602(6.4)                      | 1424(6.4)                | 250(6.4)                | 1226(6.2)               |
| L40-L45: Papulosquamous disorders                                            | 4(0.6)                 | 10(0.4)                       | 43(0.5)                       | 148(0.7)                 | 19(0.5)                 | 103(0.5)                |
| L49-L54: Urticaria and erythema                                              | 15(2.3)                | 47(2.0)                       | 161(1.7)                      | 343(1.5)                 | 54(1.4)                 | 301(1.5)                |
| L60-L75: Disorders of skin appendages                                        | 8(1.2)                 | 42(1.8) <sup>f</sup>          | 189(2.0) <sup>ef</sup>        | 368(1.7) <sup>f</sup>    | 49(1.3)                 | 209(1.1)                |
| L80-L99: Other disorders of the skin and subcutaneous tissue                 | 9(1.4)                 | 32(1.4)                       | 180(1.9) <sup>f</sup>         | 351(1.6)                 | 52(1.3)                 | 276(1.4)                |
| L10-14;55-59                                                                 | 0(0.0)                 | 1(0.0)                        | 11(0.1)                       | 11(0.0)                  | 2(0.1)                  | 18(0.1)                 |
| <b>M00-M99: Diseases of the musculoskeletal system and connective tissue</b> | <b>187(28.2)</b>       | <b>765(33.1)</b>              | <b>2713(28.6)</b>             | <b>6635(29.8)</b>        | <b>1102(28.2)</b>       | <b>5594(28.4)</b>       |
| M05-M14: Inflammatory polyarthropathies                                      | 2(0.3)                 | 18(0.8)                       | 55(0.6)                       | 107(0.5)                 | 26(0.7)                 | 174(0.9) <sup>d</sup>   |
| M15-M19: Osteoarthritis                                                      | 2(0.3)                 | 16(0.7)                       | 28(0.3)                       | 92(0.4)                  | 20(0.5)                 | 289(1.5) <sup>bcd</sup> |
| M20-M25: Other joint disorders                                               | 36(5.4)                | 135(5.8)                      | 438(4.6)                      | 1116(5.0)                | 198(5.1)                | 1207(6.1) <sup>cd</sup> |
| M50-M54: Other dorsopathies                                                  | 55(8.3)                | 268(11.6) <sup>f</sup>        | 908(9.6)                      | 2254(10.1) <sup>f</sup>  | 367(9.4)                | 1716(8.7)               |
| M60-M63: Disorders of muscles                                                | 9(1.4)                 | 54(2.3) <sup>f</sup>          | 188(2.0) <sup>f</sup>         | 482(2.2) <sup>f</sup>    | 71(1.8)                 | 296(1.5)                |
|                                                                              |                        | 431(18.7) <sup>cd</sup>       |                               |                          |                         |                         |
| M70-M79: Other soft tissue disorders                                         | 113(17.0)              | ef                            | 1488(15.7)                    | 3565(16.0) <sup>f</sup>  | 584(14.9)               | 2843(14.4)              |
| M00-02;26-27;30-36;40-43;45-49;65-67;80-94;96;99 Others                      | 6(0.9)                 | 29(1.3)                       | 76(0.8)                       | 186(0.8)                 | 37(0.9)                 | 176(0.9)                |
| <b>N00-N99: Diseases of the genitourinary system</b>                         | <b>56(8.4)</b>         | <b>170(7.4)</b>               | <b>598(6.3)</b>               | <b>1370(6.1)</b>         | <b>244(6.2)</b>         | <b>1152(5.8)</b>        |
| N20-N23: Urolithiasis                                                        | 36(5.4)                | 115(5.0)                      | 412(4.3)                      | 935(4.2)                 | 163(4.2)                | 753(3.8)                |

|                                                                                          |                 |                       |                       |                       |                        |                       |
|------------------------------------------------------------------------------------------|-----------------|-----------------------|-----------------------|-----------------------|------------------------|-----------------------|
| N30-N39: Other diseases of the urinary system                                            | 13(2.0)         | 35(1.5)               | 138(1.5)              | 296(1.3)              | 57(1.5)                | 268(1.4)              |
| N40-N53: Diseases of male genital organs                                                 | 7(1.1)          | 30(1.3)               | 94(1.0)               | 206(0.9)              | 39(1.0)                | 189(1.0)              |
| N00-08; 10-19; 25-29; 60-65 Others                                                       | 4(0.6)          | 7(0.3)                | 15(0.2)               | 49(0.2)               | 18(0.5) <sup>c</sup>   | 93(0.5) <sup>cd</sup> |
| <b>S00-T88: Injury, poisoning and certain other consequences of external causes</b>      | <b>76(11.5)</b> | <b>321(13.9)</b>      | <b>1280(13.5)</b>     | <b>2943(13.2)</b>     | <b>501(12.8)</b>       | <b>1912(9.7)</b>      |
| S00-S09: Injuries to the head                                                            | 5(0.8)          | 32(1.4)               | 138(1.5)              | 311(1.4)              | 60(1.5)                | 226(1.1)              |
| S10-S19: Injuries to the neck                                                            | 2(0.3)          | 3(0.1)                | 9(0.1)                | 32(0.1)               | 14(0.4) <sup>cdf</sup> | 18(0.1)               |
| S20-S29: Injuries to the thorax                                                          | 2(0.3)          | 12(0.5)               | 40(0.4)               | 112(0.5)              | 15(0.4)                | 78(0.4)               |
| S30-S39: Injuries to the abdomen, lower back, lumbar spine, pelvis and external genitals | 4(0.6)          | 21(0.9)               | 76(0.8)               | 159(0.7)              | 27(0.7)                | 110(0.6)              |
| S40-S49: Injuries to the shoulder and upper arm                                          | 4(0.6)          | 5(0.2)                | 30(0.3)               | 84(0.4)               | 11(0.3)                | 63(0.3)               |
| S50-S59: Injuries to the elbow and forearm                                               | 7(1.1)          | 19(0.8) <sup>f</sup>  | 64(0.7) <sup>f</sup>  | 102(0.5) <sup>f</sup> | 22(0.6)                | 66(0.3)               |
| S60-S69: Injuries to the wrist, hand and fingers                                         | 24(3.6)         | 113(4.9) <sup>f</sup> | 448(4.7) <sup>f</sup> | 1018(4.6)             | 164(4.2) <sup>f</sup>  | 596(3.0)              |
| S70-S79: Injuries to the hip and thigh                                                   | 0(0.0)          | 3(0.1)                | 13(0.1)               | 32(0.1)               | 6(0.2)                 | 17(0.1)               |
| S80-S89: Injuries to the knee and lower leg                                              | 3(0.5)          | 32(1.4)               | 108(1.1)              | 235(1.1)              | 40(1.0)                | 165(0.8)              |
| S90-S99: Injuries to the ankle and foot                                                  | 18(2.7)         | 66(2.9) <sup>f</sup>  | 239(2.5) <sup>f</sup> | 566(2.5) <sup>f</sup> | 93(2.4)                | 367(1.9)              |
| T15-T19: Effects of foreign body entering through natural orifice                        | 9(1.4)          | 34(1.5)               | 156(1.6) <sup>f</sup> | 333(1.5) <sup>f</sup> | 51(1.3)                | 199(1.0)              |
| T20-T25: Burns and corrosions of external body surface, specified by site                | 1(0.2)          | 3(0.1)                | 25(0.3)               | 70(0.3)               | 15(0.4)                | 46(0.2)               |
| T07;14;26-28;30-32;36-50;51-78;80-88 Others                                              | 4(0.6)          | 6(0.3)                | 21(0.2)               | 62(0.3)               | 15(0.4)                | 62(0.3)               |
