# Supplementary figures and images for: A Retrospective Study of Non-Communicable Diseases amongst Blue-Collar Migrant Workers in Qatar
Source: MDPI journal article supplement (doi:10.3390/ijerph19042266), 2022-02-17

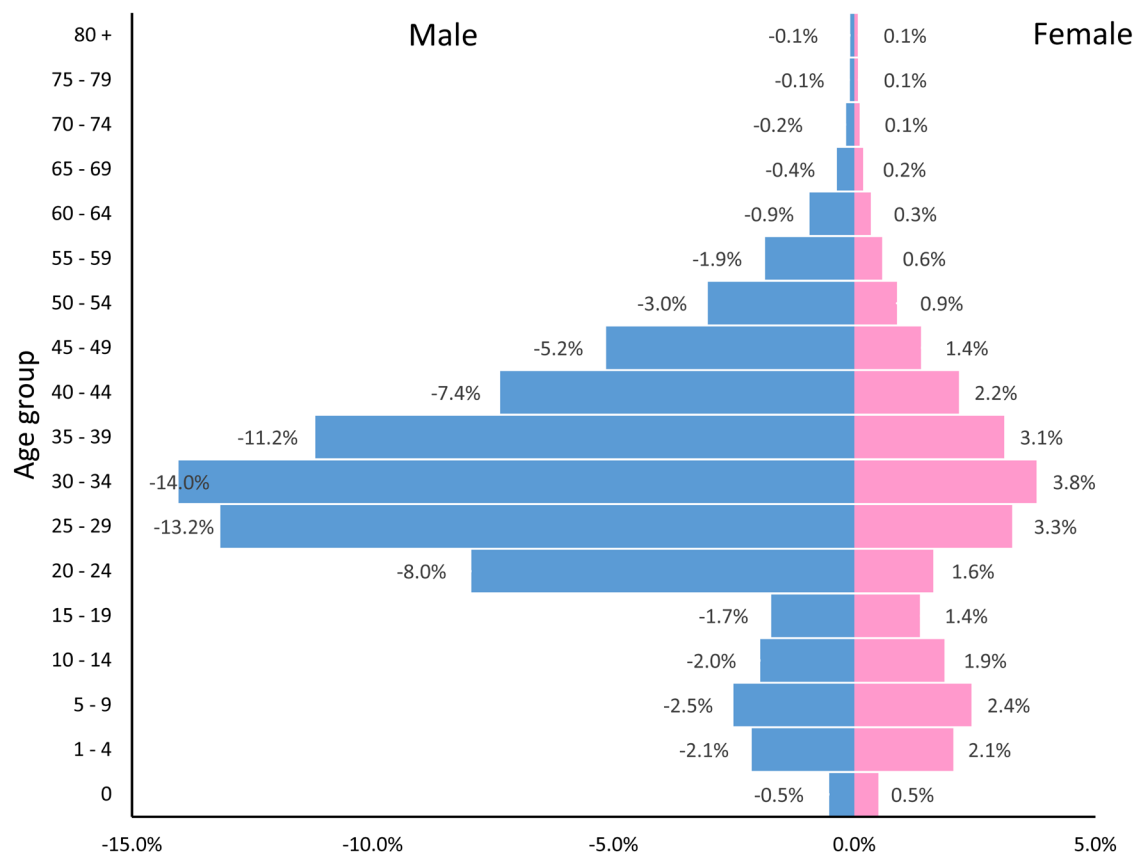

**Supplementary Figure S1. Population pyramid of Qatar by sex**

Data based on census 2018, N=2,760,170

Supplement: s1 [file s1]
